# Supplementary material for: Transcriptomic profiling of programmed cell death 1 (PD-1) expressing T cells in early rheumatoid arthritis identifies a decreased CD4 + PD-1 + signature post-treatment
Source: Springer Nature journal article supplement (doi:10.1038/s41598-023-29971-5), 2023-02-17
Supplement: MOESM2 [file 41598_2023_29971_MOESM2_ESM.pdf]

## Supplementary Material

### **Transcriptomic profiling of programmed cell death (PD-1) expressing T cells in early rheumatoid arthritis identifies a decreased CD4+PD-1+ signature post-treatment**

Katie Lowe<sup>1</sup>, Annabelle Small<sup>1</sup>, Qingxuan Song<sup>2</sup>, Ling-Yang Hao<sup>2</sup>, William Murray-Brown<sup>1</sup>,  
Susanna Proudman<sup>3,4</sup>, Malcolm D. Smith<sup>1</sup>, Sunil Nagpal<sup>2</sup>, \*Mihir D Wechalekar<sup>1,5</sup>

<sup>1</sup>Flinders University, Adelaide, South Australia 5042, Australia

<sup>2</sup>Discovery Immunology Janssen R&D, 1400 McKean Road, Spring House, PA 19477, USA

<sup>3</sup>Department of Rheumatology, Royal Adelaide Hospital, Adelaide, Australia

<sup>4</sup>Discipline of Medicine, University of Adelaide, Adelaide, Australia.

<sup>5</sup>Department of Rheumatology, Flinders Medical Centre, Adelaide, South Australia 5042, Australia

*\*Corresponding author: Mihir D. Wechalekar; [mihir.wechalekar@sa.gov.au](mailto:mihir.wechalekar@sa.gov.au)*

Number of figures: 2

Number of tables: 1

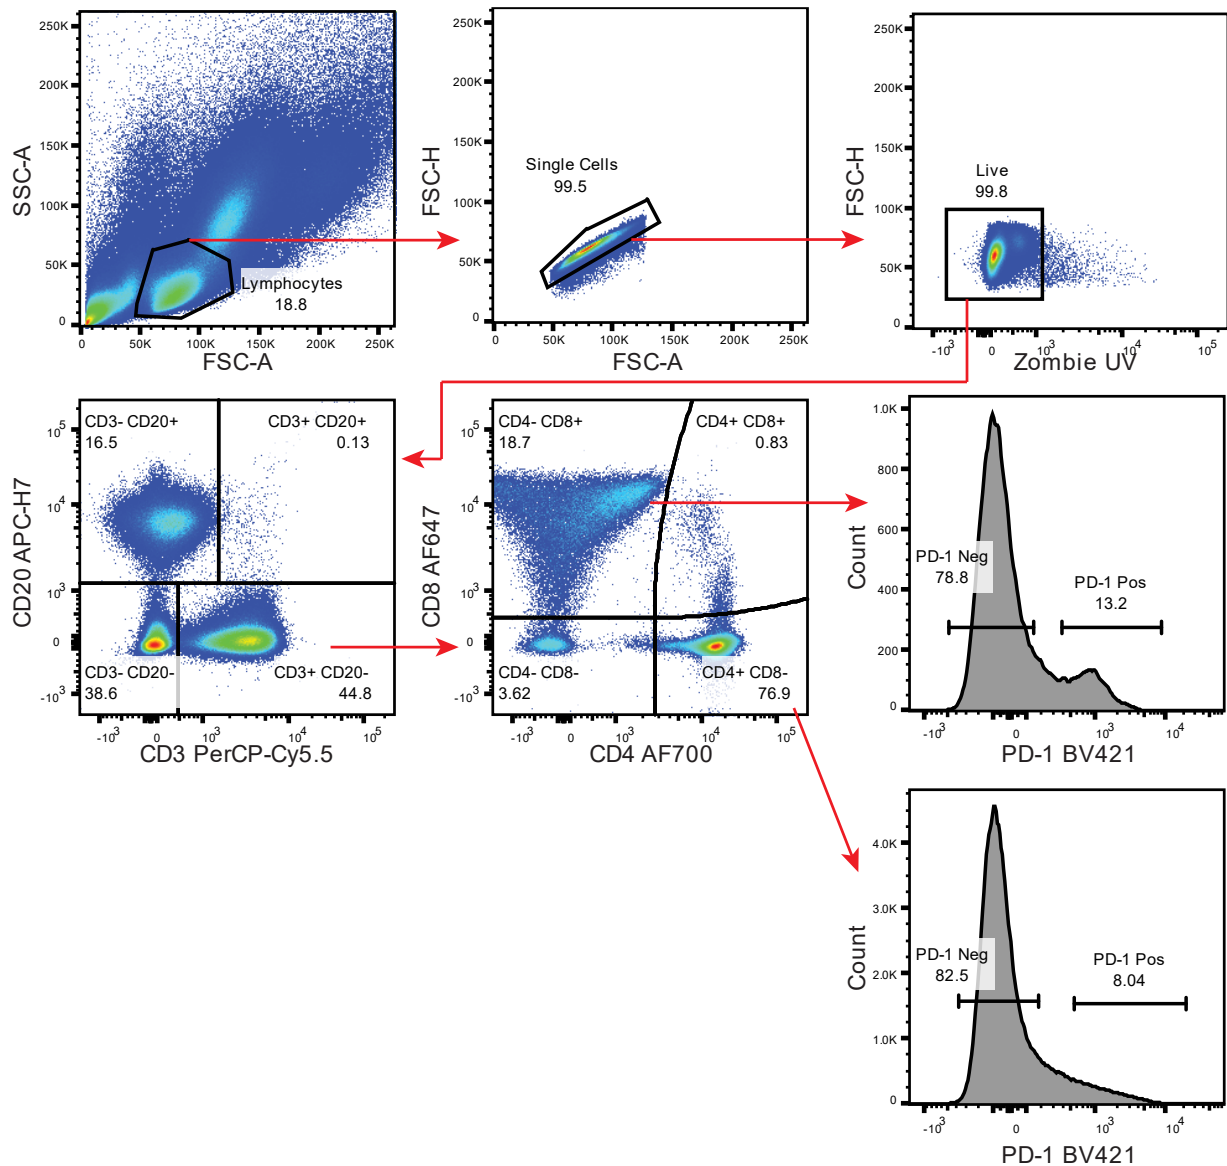

**Supplementary figure 1. Representative gating strategy used for the flow cytometric sorting of CD4<sup>+</sup>/CD8<sup>+</sup> PD-1<sup>+</sup>/PD-1<sup>-</sup> populations from isolated, fresh PBMCs.** Lymphocytes were gated based on size and complexity, single cells were gated and judged as viable based on their ability to exclude Zombie UV viability dye, CD3<sup>+</sup> lymphocytes were gated, and from these, CD4<sup>+</sup> and CD8<sup>+</sup> populations were gated. Cells were then sorted based on their expression of PD-1 (positive vs. negative), resulting in the four sorted populations.<sup>3</sup>

|                                                     | <b>Early RA<br/>baseline PBMC<br/>samples</b> | <b>Early RA baseline<br/>ST samples</b>              | <b>Early RA 6-<br/>month ST<br/>sample</b> |
|-----------------------------------------------------|-----------------------------------------------|------------------------------------------------------|--------------------------------------------|
| <b>Number of<br/>subjects</b>                       | 5                                             | 19                                                   | 19                                         |
| <b>Sex—female<br/>(%)</b>                           | 2 (40%)                                       | 8 (42%)                                              |                                            |
| <b>Age (years)</b>                                  | Mean: 55<br>Range: 37-73                      | Mean: 50.84<br>Range: 33-72                          |                                            |
| <b>Disease<br/>duration at<br/>baseline (weeks)</b> | Mean: 19.86<br>Range: 11-48                   | Mean: 17.58<br>Range: 4-40                           |                                            |
| <b>CCP (U/mL)</b>                                   | Min: 40 (3/5 with<br>value >100)              | Min: 11 (11/19<br>with value >100)                   |                                            |
| <b>RF (IU/mL)</b>                                   | Mean: 100.4<br>Range: 52-280<br><br>(1/5>900) | Mean: 130<br>Range: 16-570<br><br>(2/19 RF negative) |                                            |
| <b>CRP (mg/dl)</b>                                  | Mean: 2<br>Range: 0.14-5.58                   | Mean: 2.41<br>Range: 0.069-9.2                       | Mean: 0.60<br>Range: 0.034-4.6             |
| <b>ESR (mm/hr)</b>                                  | Mean: 36.4<br>Range: 7-79                     | Mean: 39.42<br>Range: 7-108                          | Mean: 14.42<br>Range: 1-52                 |
| <b>DAS-28 (ESR)</b>                                 | Mean: 5.19<br>Range: 4.03-6.55                | Mean: 5.80<br>Range: 4.80-7.40                       | Mean: 3.10<br>Range: 1.08-5.56             |

**Supplementary table 1.** Patient demographics for the two cohorts used in this study. Early RA baseline PBMC samples (column 2, n=5) were sorted into CD4<sup>+</sup>/CD8<sup>+</sup> PD-1<sup>+</sup> and PD-1<sup>-</sup> T cell populations and subjected to bulk RNA sequencing. Early RA ST samples (n=19) baseline and post- 6-months of tDMARD treatment are shown in columns 3 and 4 (adapted from [1]).

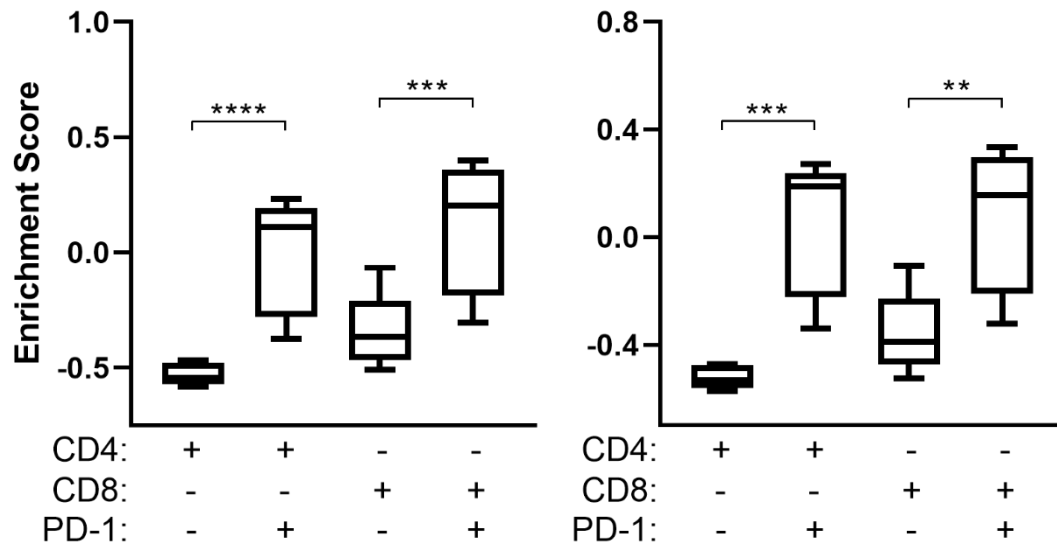

**Supplementary figure 2. Exhaustion signatures are enriched in both CD4<sup>+</sup> and CD8<sup>+</sup> PD-1<sup>+</sup> cells from the peripheral blood of patients with early RA compared to PD-1<sup>-</sup> cells.** Identified genes in sorted CD4<sup>+</sup>/CD8<sup>+</sup> PD-1<sup>+</sup> and PD-1<sup>-</sup> cells from five patients with early RA were statistically compared with existing exhaustion gene signatures from CD4<sup>+</sup> T cells (left graph) and CD8<sup>+</sup> T cells from patients with hepatocellular carcinoma (right graph) [2]. Enrichment for exhaustion signatures are shown. Data is expressed as box and whisker plots from min to max, with box representing 25<sup>th</sup> to 75<sup>th</sup> percentile  $\pm$  median. Comparisons were made by one-way ANOVA followed by Tukey's multiple comparison test, \*\*p<0.01; \*\*\*p<0.001; \*\*\*\*p<0.0001.

## References

1. Walsh, A.M., et al., *Triple DMARD treatment in early rheumatoid arthritis modulates synovial T cell activation and plasmablast/plasma cell differentiation pathways*. PloS one, 2017. **12**(9): p. e0183928-e0183928.
2. Zheng, C., et al., *Landscape of Infiltrating T Cells in Liver Cancer Revealed by Single-Cell Sequencing*. Cell, 2017. **169**(7): p. 1342-1356.e16.
